# Supplementary material for: A europium shuttle for launching perovskites to space: using Eu2+/Eu3+ redox chemistry to boost photostability and radiation hardness of complex lead halides
Source: Royal Society of Chemistry journal article supplement (doi:10.1039/d3ta07598b), 2024-01-01
Supplement: d3ta07598b1.pdf [file d3ta07598b1.pdf]

## Electronic supplementary information

### Europium shuttle for launching perovskites to space: using $\text{Eu}^{2+}/\text{Eu}^{3+}$ redox chemistry to boost photostability and radiation hardness of complex lead halides

Marina I. Ustinova<sup>1</sup>, Lyubov A. Frolova<sup>1\*</sup>, Alexandra V. Rasmetyeva<sup>2</sup>, Nikita A. Emelianov<sup>1</sup>, Maxim N. Sarychev<sup>2</sup>, Gennadii V. Shilov<sup>1</sup>, Pavel P. Kushch<sup>1</sup>, Nadezhda N. Dremova<sup>1</sup>, Galina A. Kichigina<sup>1</sup>, Andrey I. Kukhareenko<sup>2,3</sup>, Dmitry P. Kiryukhin,<sup>1</sup> Ernst Z. Kurmaev<sup>2,3</sup>, Ivan S. Zhidkov<sup>2,3\*</sup> and Pavel A. Troshin<sup>4,1\*</sup>

<sup>1</sup> Federal Research Center for Problems of Chemical Physics and Medicinal Chemistry of the Russian Academy of Sciences, Academician Semenov ave. 1, 142432 Chernogolovka, Russia

<sup>2</sup> Institute of Physics and Technology, Ural Federal University, Mira 19 Street, Yekaterinburg 620002, Russia

<sup>3</sup> M. N. Mikheev Institute of Metal Physics of Ural Branch of Russian Academy of Sciences, S. Kovalevskoi 18 Street, Yekaterinburg 620108, Russia

<sup>4</sup> Zhengzhou Research Institute of HIT, Longyuan East 7th 26, Jinshui District, Zhengzhou 450003, China

#### Contents

Figure S1. XRD patterns of  $\text{MAPb}_{1-x}\text{Eu}_x\text{I}_3$  and  $\text{Cs}_{0.12}\text{FA}_{0.88}\text{Pb}_{1-x}\text{Eu}_x\text{I}_3$  films with different Eu loadings;

Figure S2. The XRD pattern of the precipitate formed upon interaction of  $\text{Eu}^{2+}$  with  $\text{Pb}^{2+}$  in the presence of MAI and DMF solvent;

Figure S3. The XRD patterns of the  $\text{PbI}_2$  films with and without Eu modification after 430 hours of exposure to light (85 mW/cm<sup>2</sup>, 32 °C);

Figure S4. AFM topography and IR s-SNOM images taken at the FA characteristic vibration frequency for  $\text{Cs}_{0.12}\text{FA}_{0.88}\text{PbI}_3$  films after exposure to  $1 \times 10^{16}$  e/cm<sup>2</sup> fluence of 8.5 MeV electrons;

Figure S5. The XPS analysis of the  $\text{Cs}_{0.12}\text{FA}_{0.88}\text{PbI}_3$  and  $\text{Cs}_{0.12}\text{FA}_{0.88}\text{Pb}_{0.999}\text{Eu}_{0.001}\text{I}_3$  films before and after the exposure of high-energy electrons;

Figure S6. The influence of Eu-loading on the photovoltaic characteristics of solar cells in the n-i-p structure;

Figure S7. The EQE spectra of the n-i-p solar cells;

Figure S8. Evolution of the EQE spectra of the p-i-n solar cells during receiving the different <sup>60</sup>Co  $\gamma$ -irradiation dose.

Table S1. Surface composition of the  $\text{MAPb}_{1-x}\text{Eu}_x\text{I}_3$  perovskite films;

Table S2. Surface composition of the  $\text{Cs}_{0.12}\text{FA}_{0.88}\text{Pb}_{1-x}\text{Eu}_x\text{I}_3$  perovskite films;

Table S3. The average and the best values of the photovoltaic characteristics of n-i-p devices;

Table S4. The average and the best values of the photovoltaic characteristics of solar cells in the p-i-n structure;

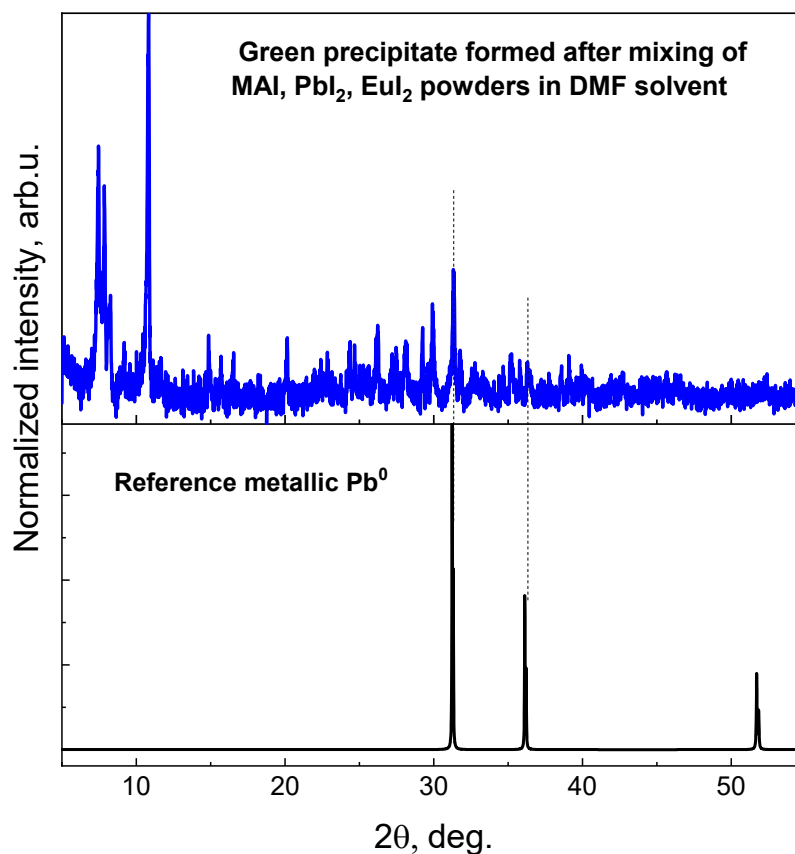

Figure S1. The XRD pattern of the precipitate formed upon interaction of Eu<sup>2+</sup> with Pb<sup>2+</sup> in the presence of MAI and DMF solvent.

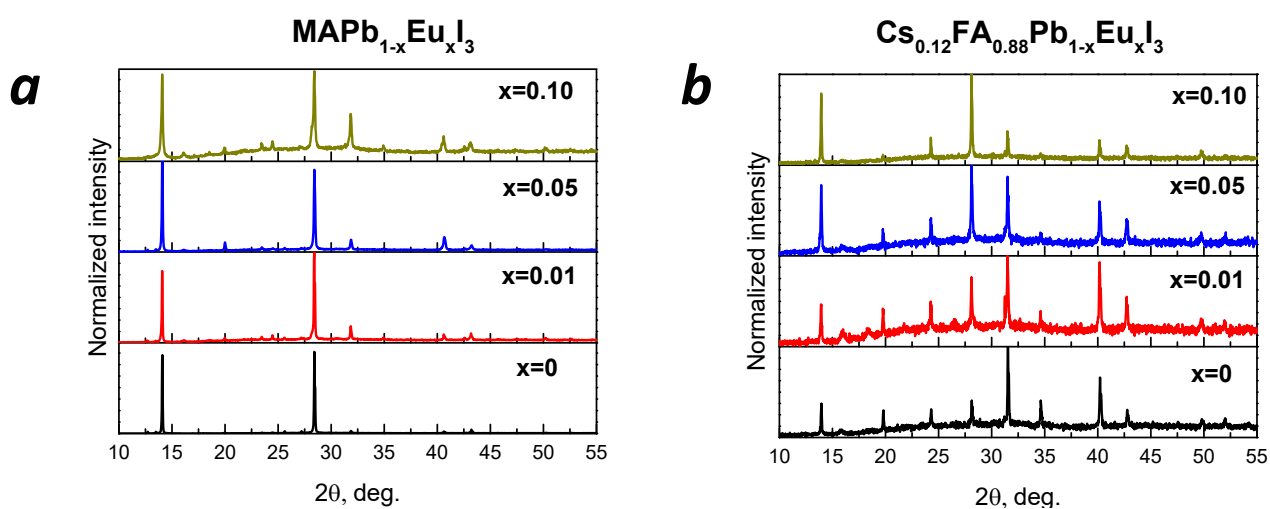

Figure S2. XRD patterns of MAPb<sub>1-x</sub>Eu<sub>x</sub>I<sub>3</sub> and Cs<sub>0.12</sub>FA<sub>0.88</sub>Pb<sub>1-x</sub>Eu<sub>x</sub>I<sub>3</sub> films with different Eu loadings.

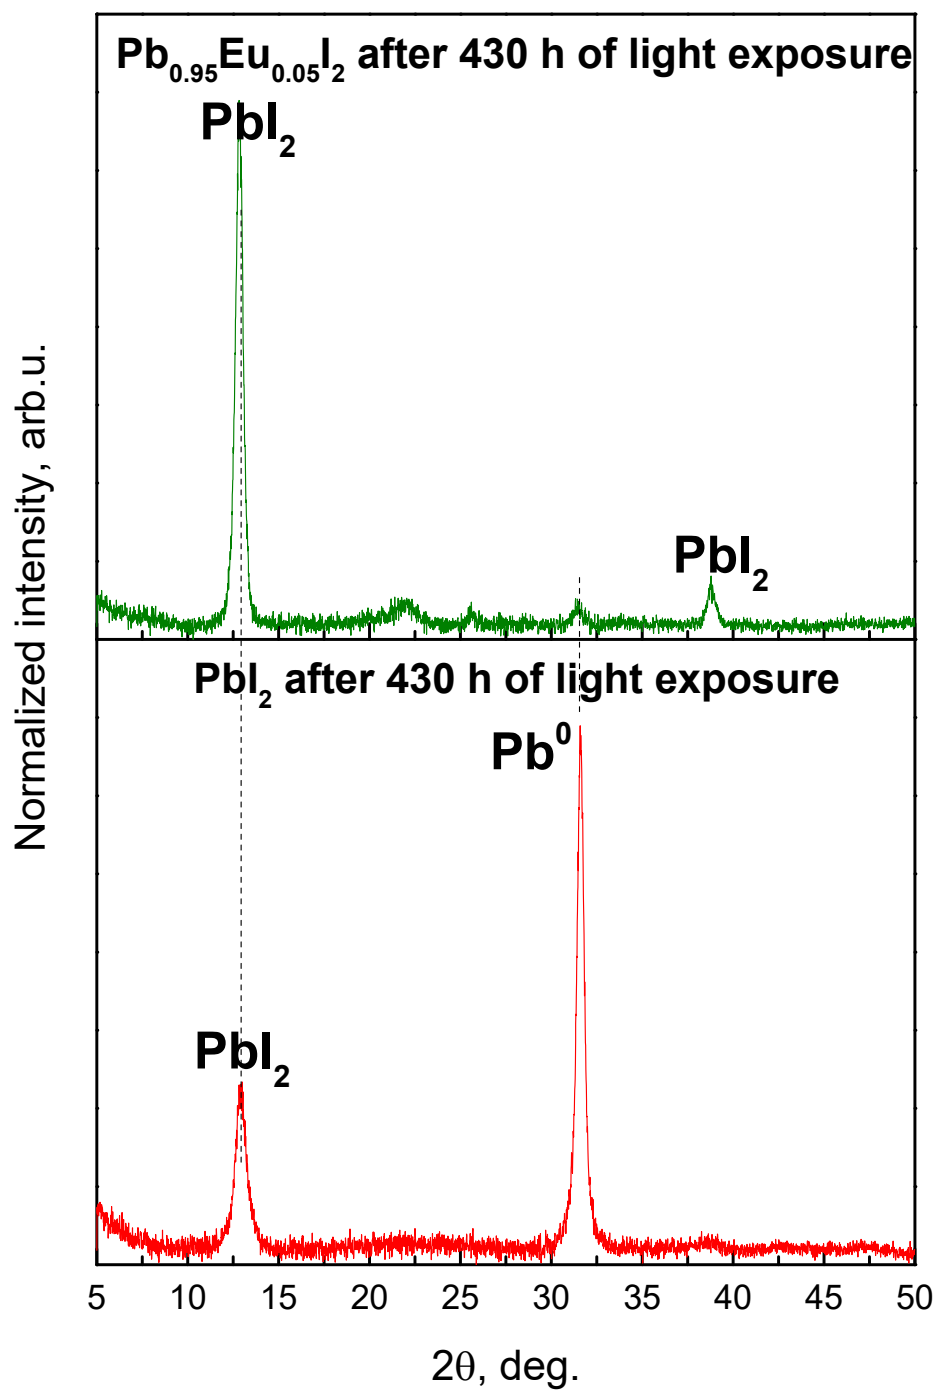

Figure S3. The XRD patterns of the PbI<sub>2</sub> films with (top) and without (bottom) Eu modification after 430 hours of exposure to light (85 mW/cm<sup>2</sup>, 32 °C).

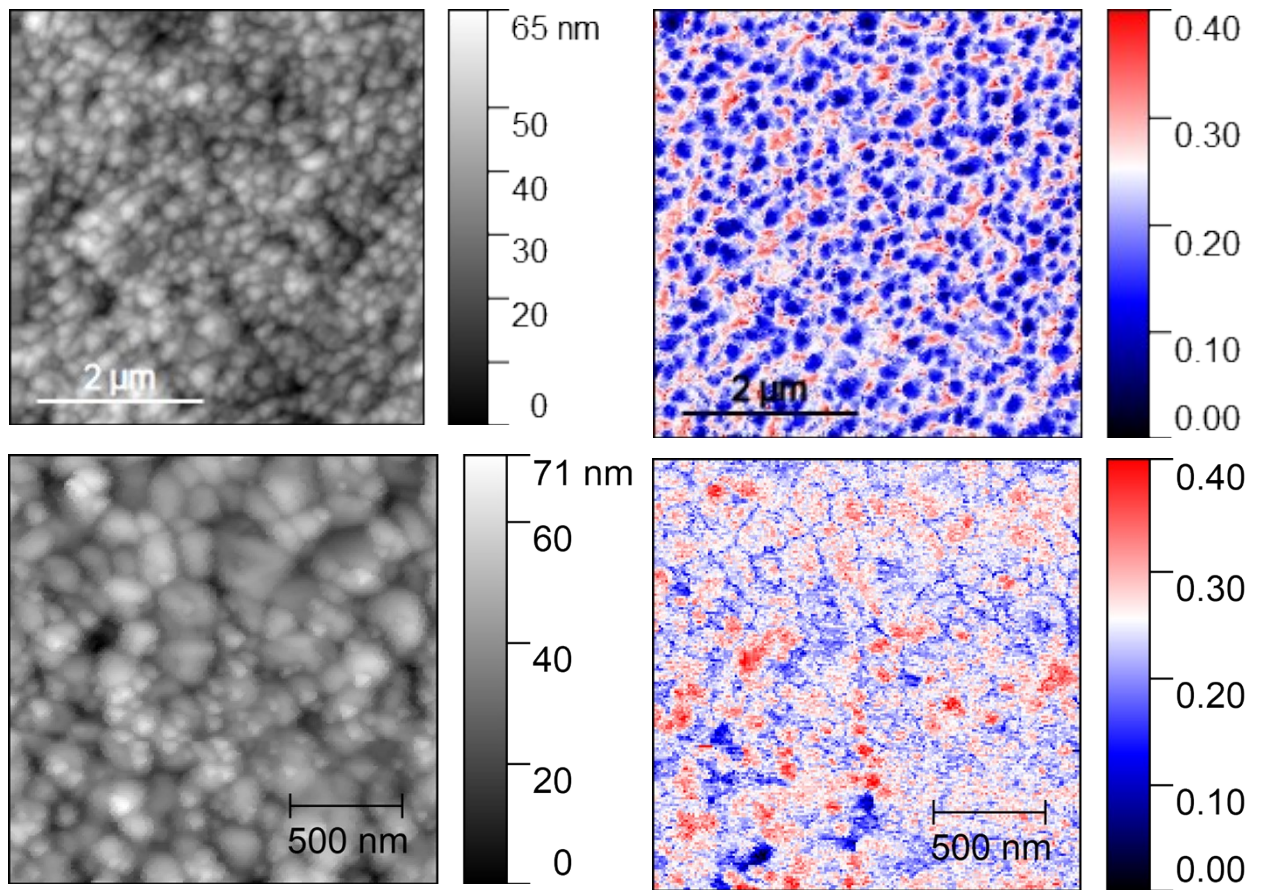

Figure S4. AFM topography (left column) and IR s-SNOM images taken at the FA characteristic vibration frequency for  $\text{Cs}_{0.12}\text{FA}_{0.88}\text{PbI}_3$  films after exposure to  $1 \times 10^{16} \text{ e/cm}^2$  fluence of 8.5 MeV electrons. The images are presented with  $5 \times 5 \mu\text{m}$  (top) and  $2 \times 2 \mu\text{m}$  (bottom) scalebars to show that the newly formed grains on the surface are enriched with FA cations.

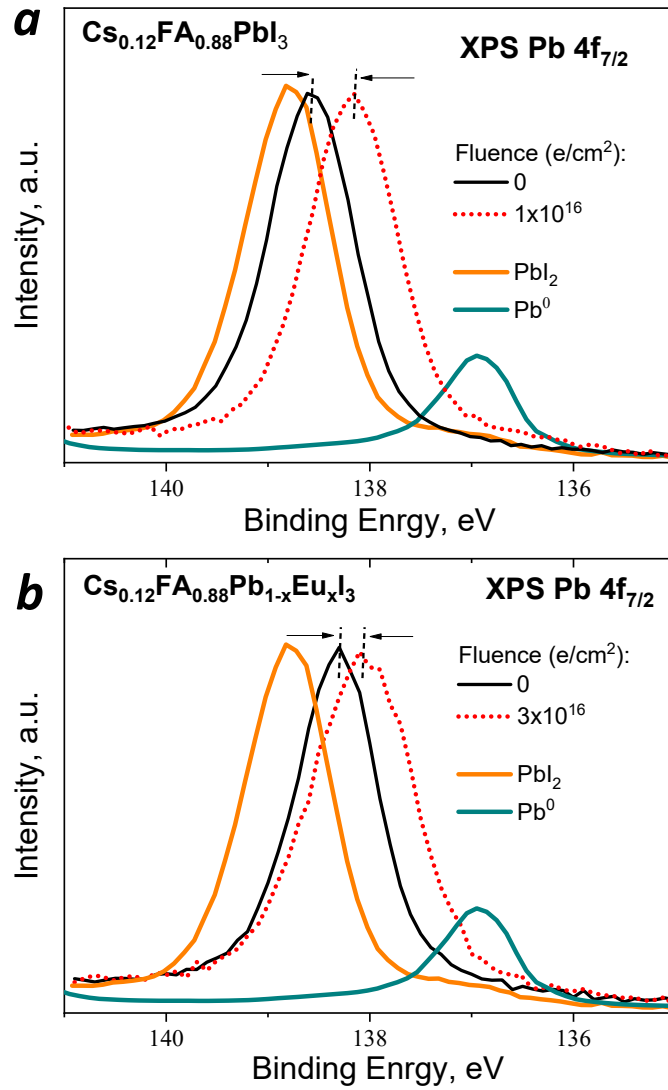

Figure S5. The XPS analysis of the  $\text{Cs}_{0.12}\text{FA}_{0.88}\text{PbI}_3$  and  $\text{Cs}_{0.12}\text{FA}_{0.88}\text{Pb}_{0.999}\text{Eu}_{0.001}\text{I}_3$  films before and after the exposure of high-energy electrons ( $1 \cdot 10^{16}$  and  $3 \cdot 10^{16} \text{ e} \cdot \text{cm}^{-2}$  doses, respectively).

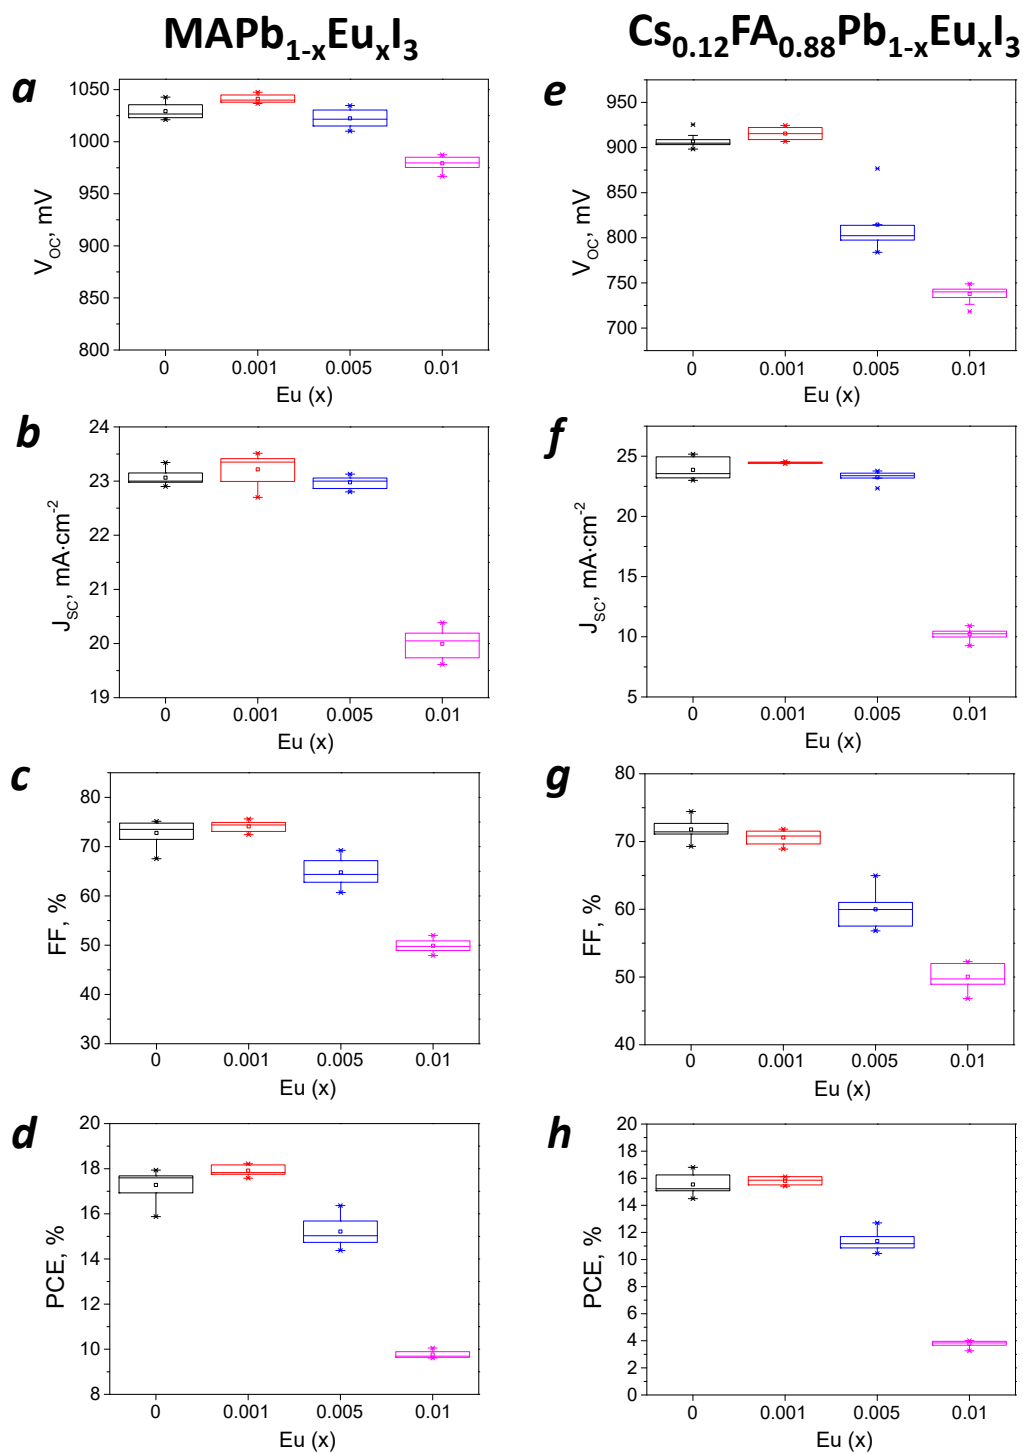

Figure S6. The influence of Eu-loading on the photovoltaic characteristics ( $V_{oc}$ ,  $J_{sc}$ , FF, and PCE) of n-i-p PSCs (ITO/SnO<sub>2</sub>/PCBA/Cs<sub>0.12</sub>FA<sub>0.88</sub>Pb<sub>1-x</sub>Eu<sub>x</sub>I<sub>3</sub> or MAPb<sub>1-x</sub>M<sub>x</sub>I<sub>3</sub>/PTA/V<sub>2</sub>O<sub>5.8</sub>/Al) based on MAPb<sub>1-x</sub>Eu<sub>x</sub>I<sub>3</sub> (a) and Cs<sub>0.12</sub>FA<sub>0.88</sub>Pb<sub>1-x</sub>Eu<sub>x</sub>I<sub>3</sub> (b), where  $x = 0.001, 0.005, \text{ and } 0.01$ .

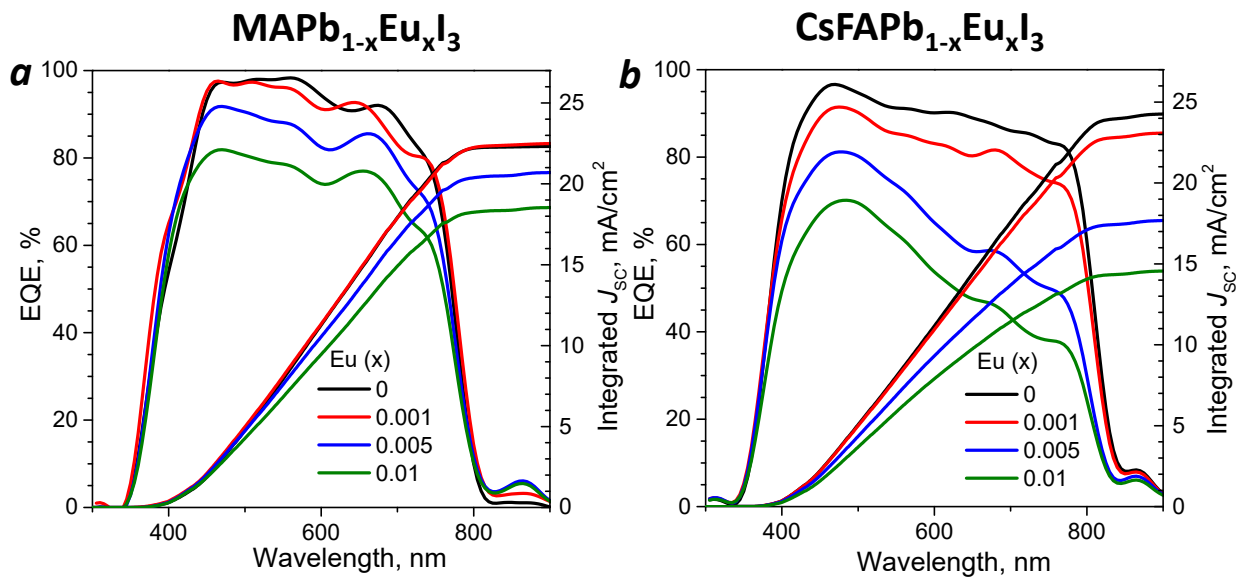

Figure S7. The EQE spectra of the solar cells with the structure of ITO/SnO<sub>2</sub>/PCBA/perovskite/PTA/V<sub>2</sub>O<sub>5- $\delta$</sub> /Al based on the or  $\text{MAPb}_{1-x}\text{M}_x\text{I}_3$  (a) and  $\text{Cs}_{0.12}\text{FA}_{0.88}\text{Pb}_{1-x}\text{Eu}_x\text{I}_3$  (b), where  $x=0, 0.001, 0.05, \text{ and } 0.01$ .

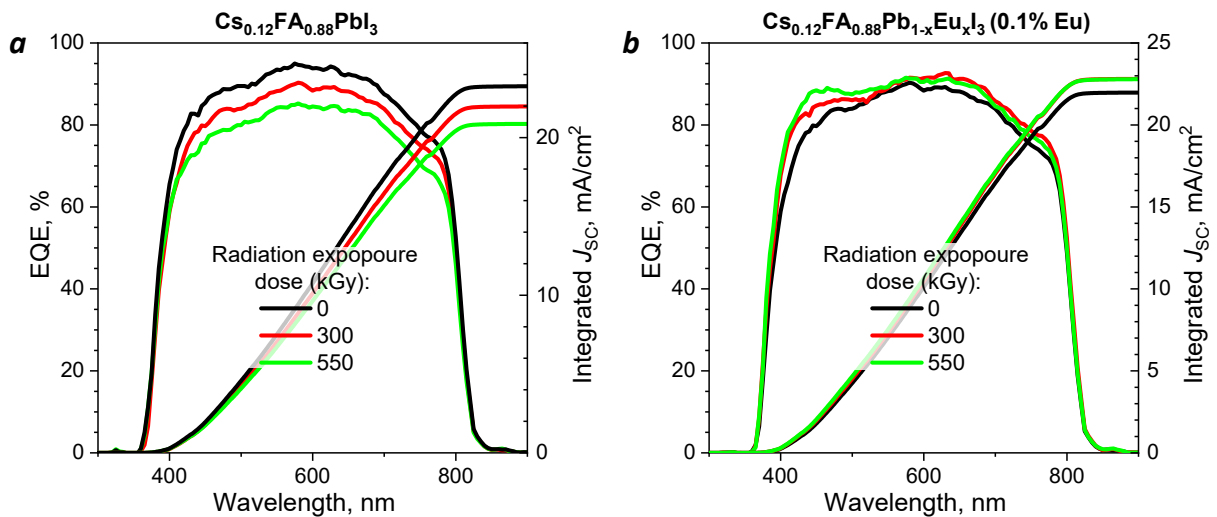

Figure S8. Evolution of the EQE spectra of the PET/ITO/PTA/Perovskite/PCBM/BCP/Al solar cells upon exposure to <sup>60</sup>Co gamma rays.

Table S1. Surface composition of the MAPb<sub>1-x</sub>Eu<sub>x</sub>I<sub>3</sub> perovskite films (in at.%).

| <b>Sample</b> | <b>Si</b> | <b>C</b> | <b>O</b> | <b>N</b> | <b>N:(Pb+Eu)</b> | <b>Pb</b> | <b>I</b> | <b>I:(Pb+Eu)</b> | <b>Eu</b> | <b>Eu:Pb</b> |
|---------------|-----------|----------|----------|----------|------------------|-----------|----------|------------------|-----------|--------------|
| undoped       | 5.6       | 45.9     | 9.2      | 6.6      | 0.67             | 9.8       | 22.9     | 2.33             | -         | -            |
| 1% Eu         | 6.1       | 44.3     | 14.2     | 5        | 0.48             | 9.3       | 20.1     | 1.95             | 1.0       | 0.11         |
| 5% Eu         | 4.4       | 54.0     | 13.3     | 3.9      | 0.36             | 6.2       | 16.1     | 1.93             | 2.1       | 0.34         |
| 10% Eu        | 3.0       | 53.7     | 13.7     | 4.5      | 0.49             | 5.1       | 16.0     | 1.76             | 4.0       | 0.78         |

Table S2. Surface composition of the Cs<sub>0.12</sub>FA<sub>0.88</sub>Pb<sub>1-x</sub>Eu<sub>x</sub>I<sub>3</sub> perovskite films (in at.%).

| <b>Sample</b> | <b>C</b> | <b>O</b> | <b>N</b> | <b>N:(Pb+Eu)</b> | <b>Pb</b> | <b>I</b> | <b>Cs</b> | <b>I:(Pb+Eu)</b> | <b>Eu</b> | <b>Eu:Pb</b> |
|---------------|----------|----------|----------|------------------|-----------|----------|-----------|------------------|-----------|--------------|
| undoped       | 30       | 2.1      | 20.1     | 1,53             | 13.1      | 33.4     | 1.3       | 2.55             | -         | -            |
| 1% Eu         | 42.2     | 5.7      | 14.7     | 1,37             | 9         | 25.8     | 0.9       | 2.41             | 1.7       | 0.19         |
| 5% Eu         | 43.3     | 13.5     | 8.8      | 0,80             | 5.5       | 22.8     | 0.6       | 2.07             | 5.5       | 1            |
| 10% Eu        | 47.7     | 16.7     | 6        | 0,55             | 5.5       | 18       | 0.7       | 1.81             | 5.4       | 0.98         |
| 20% Eu        | 46.2     | 20.6     | 5.2      | 0,53             | 3.5       | 17.5     | 0.6       | 1.77             | 6.4       | 1.83         |



Table S3. The average and the best (in brackets) values of power conversion efficiency ( $\eta$ ), open-circuit voltage ( $V_{OC}$ ), short-circuit current density ( $J_{SC}$ ), and fill factor ( $FF$ ) of the ITO/SnO<sub>2</sub>/PCBA/MAPb<sub>1-x</sub>M<sub>x</sub>I<sub>3</sub> or Cs<sub>0.12</sub>FA<sub>0.88</sub>Pb<sub>1-x</sub>Eu<sub>x</sub>I<sub>3</sub>/PTA/V<sub>2</sub>O<sub>5- $\delta$</sub> /Al devices (x = 0.001, 0.005 and 0.01).\*

| Composition                                                                          | Scan           | $V_{OC}$ , V                         | $J_{SC}$ , mA cm <sup>-2</sup>   | FF, %                            | PCE, %                           |
|--------------------------------------------------------------------------------------|----------------|--------------------------------------|----------------------------------|----------------------------------|----------------------------------|
| <b>MAPb<sub>1-x</sub>Eu<sub>x</sub>I<sub>3</sub></b>                                 |                |                                      |                                  |                                  |                                  |
| <b>x = 0 (Pristine)</b>                                                              | Forward        | (1.042)<br>1.029±0.009               | (23.3)<br>23.1±0.1               | (74.5)<br>72.0±3.1               | (17.6)<br>17.1±0.8               |
|                                                                                      | Reverse        | (1.043)<br>1.029±0.009               | (23.3)<br>23.0±0.2               | (75.1)<br>73.6±2.1               | (17.9)<br>17.5±0.6               |
| <b>x = 0.001</b>                                                                     | <b>Forward</b> | <b>(1.047)</b><br><b>1.041±0.004</b> | <b>(23.5)</b><br><b>23.3±0.3</b> | <b>(74.4)</b><br><b>73.3±0.8</b> | <b>(17.9)</b><br><b>17.7±0.2</b> |
|                                                                                      | <b>Reverse</b> | <b>(1.047)</b><br><b>1.041±0.005</b> | <b>(23.4)</b><br><b>23.2±0.3</b> | <b>(75.2)</b><br><b>75.0±0.6</b> | <b>(18.2)</b><br><b>18.1±0.2</b> |
| <b>x = 0.005</b>                                                                     | Forward        | (1.034)<br>1.024±0.008               | (23.0)<br>22.9±0.1               | (69.2)<br>65.7±2.3               | (16.3)<br>15.4±0.5               |
|                                                                                      | Reverse        | (1.035)<br>1.021±0.009               | (23.1)<br>23.0±0.1               | (68.0)<br>63.9±2.8               | (16.0)<br>15.0±0.7               |
| <b>x = 0.01</b>                                                                      | Forward        | (0.987)<br>0.982±0.005               | (20.4)<br>20.0±0.3               | (50.2)<br>49.0±0.9               | (9.7)<br>9.6±0.1                 |
|                                                                                      | Reverse        | (0.986)<br>0.976±0.008               | (20.2)<br>19.9±0.3               | (52.0)<br>50.8±1.2               | (10.1)<br>9.8±0.2                |
| <b>Cs<sub>0.12</sub>FA<sub>0.88</sub>Pb<sub>1-x</sub>Eu<sub>x</sub>I<sub>3</sub></b> |                |                                      |                                  |                                  |                                  |
| <b>x = 0 (Pristine)</b>                                                              | Forward        | (0.905)<br>0.904±0.004               | (24.9)<br>23.6±0.7               | (72.7)<br>71.8±0.7               | (16.3)<br>15.3±0.5               |
|                                                                                      | Reverse        | (0.925)<br>0.908±0.007               | (25.2)<br>24.0±0.9               | (74.4)<br>71.8±1.7               | (16.8)<br>15.7±0.9               |
| <b>x = 0.001</b>                                                                     | <b>Forward</b> | <b>(0.911)</b><br><b>0.908±0.003</b> | <b>(24.6)</b><br><b>24.5±0.1</b> | <b>(70.4)</b><br><b>70.0±1.1</b> | <b>(15.6)</b><br><b>15.5±0.1</b> |
|                                                                                      | <b>Reverse</b> | <b>(0.925)</b><br><b>0.922±0.003</b> | <b>(24.5)</b><br><b>24.4±0.1</b> | <b>(71.8)</b><br><b>71.5±0.4</b> | <b>(16.2)</b><br><b>16.1±0.1</b> |
| <b>x = 0.005</b>                                                                     | Forward        | (0.877)<br>0.813±0.031               | (23.8)<br>23.3±0.5               | (64.4)<br>58.7±2.8               | (12.6)<br>11.1±0.7               |
|                                                                                      | Reverse        | (0.873)<br>0.816±0.029               | (23.7)<br>23.2±0.5               | (65.0)<br>61.3±2.0               | (12.7)<br>11.6±0.6               |
| <b>x = 0.01</b>                                                                      | Forward        | (0.749)<br>0.740±0.008               | (10.3)<br>10.0±0.4               | (52.3)<br>51.6±0.9               | (4.0)<br>3.8±0.3                 |
|                                                                                      | Reverse        | (0.743)<br>0.735±0.009               | (10.9)<br>10.4±0.4               | (49.3)<br>48.5±0.9               | (4.0)<br>3.7±0.3                 |

\* - The  $J$ - $V$  curves were measured in forward and reverse directions with the scan rate of 0.01 V/s

Table S4. The average and the best (in brackets) values of power conversion efficiency ( $\eta$ ), open-circuit voltage ( $V_{OC}$ ), short-circuit current density ( $J_{SC}$ ), and fill factor ( $FF$ ) of the PET/ITO/PTA/Cs<sub>0.12</sub>FA<sub>0.88</sub>Pb<sub>1-x</sub>Eu<sub>x</sub>I<sub>3</sub> ( $x=0$  and  $0.001$ )/PCBM/BCP/Al devices.\*

| Composition             | Scan direction | $V_{OC}$ , V           | $J_{SC}$ , mA cm <sup>-2</sup> | FF, %              | PCE, %             |
|-------------------------|----------------|------------------------|--------------------------------|--------------------|--------------------|
| <b>x = 0.001</b>        | Forward        | (0.958)<br>0.950±0.022 | (22.6)<br>22.0±0.5             | (79.3)<br>73.7±4.3 | (17.1)<br>15.4±1.2 |
|                         | Reverse        | (0.983)<br>0.949±0.023 | (22.5)<br>21.8±0.8             | (78.7)<br>75.4±2.1 | (17.5)<br>15.6±1.3 |
| <b>x = 0 (Pristine)</b> | Forward        | (1.022)<br>0.982±0.059 | (23.0)<br>22.4±1.1             | (78.2)<br>71.3±7.5 | (18.4)<br>15.7±1.8 |
|                         | Reverse        | (1.026)<br>0.978±0.060 | (23.2)<br>22.4±1.0             | (79.0)<br>72.5±7.3 | (19.0)<br>15.9±2.2 |

\* - The  $J$ - $V$  curves were measured in forward and reverse directions with the scan rate of 0.01 V/s
